# Supplementary material
Source: Springer Nature journal article supplement (https://www.springermedizin.de/resource/supplementary/12906_2012_1502_MOESM4_ESM.pdf/9522010)

Scores Comp[1] vs. Comp[2] colored by Sample Group (original)

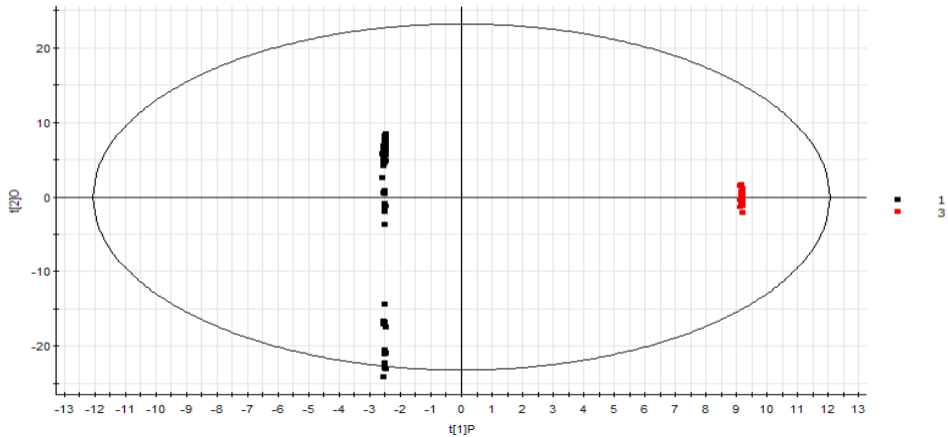

Supplement: MOESM4 [file 9522010]
